# Supplementary material for: Baseline urine pH is related to effective urine alkalization by short-term alkaline water supplementation: data from a self-controlled study in healthy Chinese volunteers following a systematic review and meta-analysis of literature
Source: PubMed Central journal article supplement — Transl Androl Urol. 2022 May;11(5):710–9. doi: 10.21037/tau-22-280 (PMC9177264; doi:10.21037/tau-22-280), 2022-05
Supplement: tau-11-05-710-dss.pdf [file tau-11-05-710-dss.pdf]

## Data Sharing Statement

|                     |                                                                                                                                                     |                                                                                                               |
|---------------------|-----------------------------------------------------------------------------------------------------------------------------------------------------|---------------------------------------------------------------------------------------------------------------|
| <b>Article Info</b> | <a href="https://dx.doi.org/10.21037/tau-22-280">https://dx.doi.org/10.21037/tau-22-280</a>                                                         |                                                                                                               |
| <b>Item</b>         | <b>Question</b>                                                                                                                                     | <b>Authors' Response<br/>(place – if not applicable)</b>                                                      |
| 1                   | Would you like to share data collected for your study to others?                                                                                    | Yes                                                                                                           |
| 2                   | If not, would you like to share the reason for your decision?                                                                                       | –                                                                                                             |
| 3                   | What data in particular will be shared?                                                                                                             | The template data collection forms, data used for all analyses, full study protocol and clinical information. |
| 4                   | Any other documents will be shared? Such as study protocol, statistical analysis plan, informed consent form, clinical study report, analytic code. | Yes                                                                                                           |
| 5                   | When will data availability begin?                                                                                                                  | The data will availability after article published.                                                           |
| 6                   | When will data availability end?                                                                                                                    | Unlimited                                                                                                     |
| 7                   | To whom will you share the data?                                                                                                                    | All readers                                                                                                   |

|    |                                                  |                                                              |
|----|--------------------------------------------------|--------------------------------------------------------------|
| 8  | For what type of analysis or purpose?            | For Research use Only.                                       |
| 9  | How or where can the data/documents be obtained? | The data can be accessed by e-mail the corresponding author. |
| 10 | Any other restrictions?                          | No                                                           |
